# Supplementary material for: Electrical Stimulation of C6 Glia-Precursor Cells In Vitro Differentially Modulates Gene Expression Related to Chronic Pain Pathways
Source: MDPI journal article supplement (doi:10.3390/brainsci9110303), 2019-10-31
Supplement: s1 [file s1]

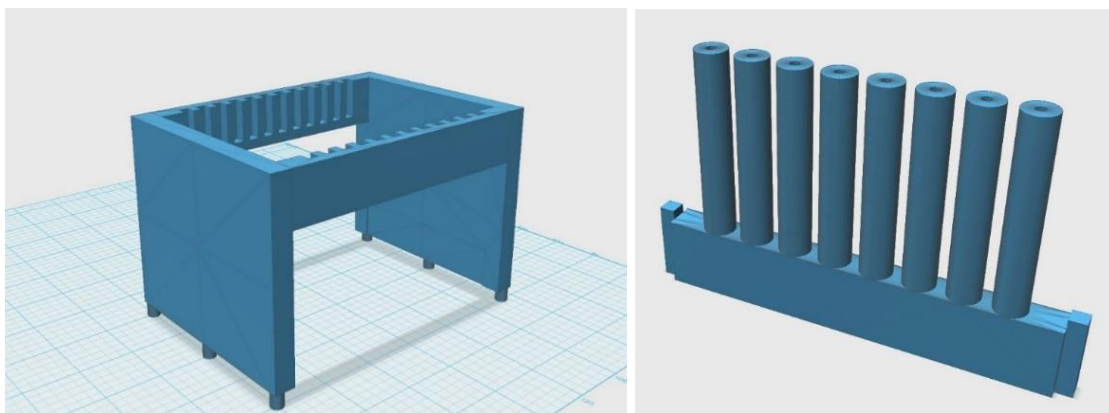

**Figure S1.** Digital representation of the electrode holder (right) and stimulation apparatus (left). The grooves in the apparatus guide the holder into an ideal position for stimulating any given well on a 96-well plate. Both guide and holder were created using the 123D Design CAD software and printed on a MakerBot Replicator+ 3D printer. The files for this apparatus are freely available on thingiverse.com (thing: 3614719).

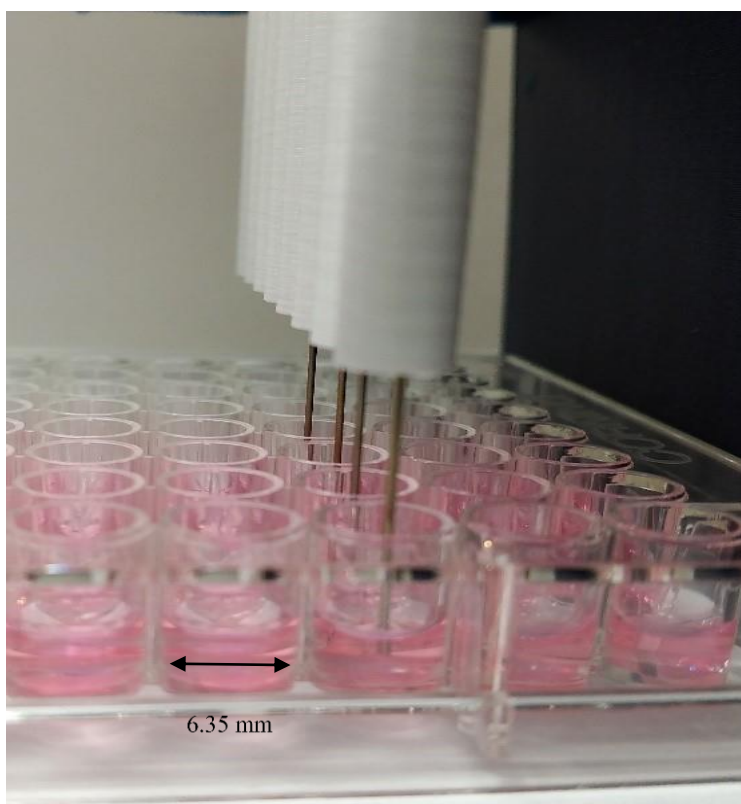

**Figure S2.** A photograph showing the electrical stimulation setup. Concentric bipolar electrodes housed within the electrode guide stimulating row 3 of a 96-well plate. The four electrodes are pictured with submerged tips that are suspended in 100  $\mu$ L volume. Well diameter is 6.35 mm as indicated.
